# Supplementary material for: A novel household water insecurity scale: Procedures and psychometric analysis among postpartum women in western Kenya
Source: PubMed Central journal article supplement (PMC5993289; doi:10.1371/journal.pone.0198591), 2018-06-08

**S2 Fig. Scree plot showing cut-off point for retained scale factors using exploratory factor analysis**

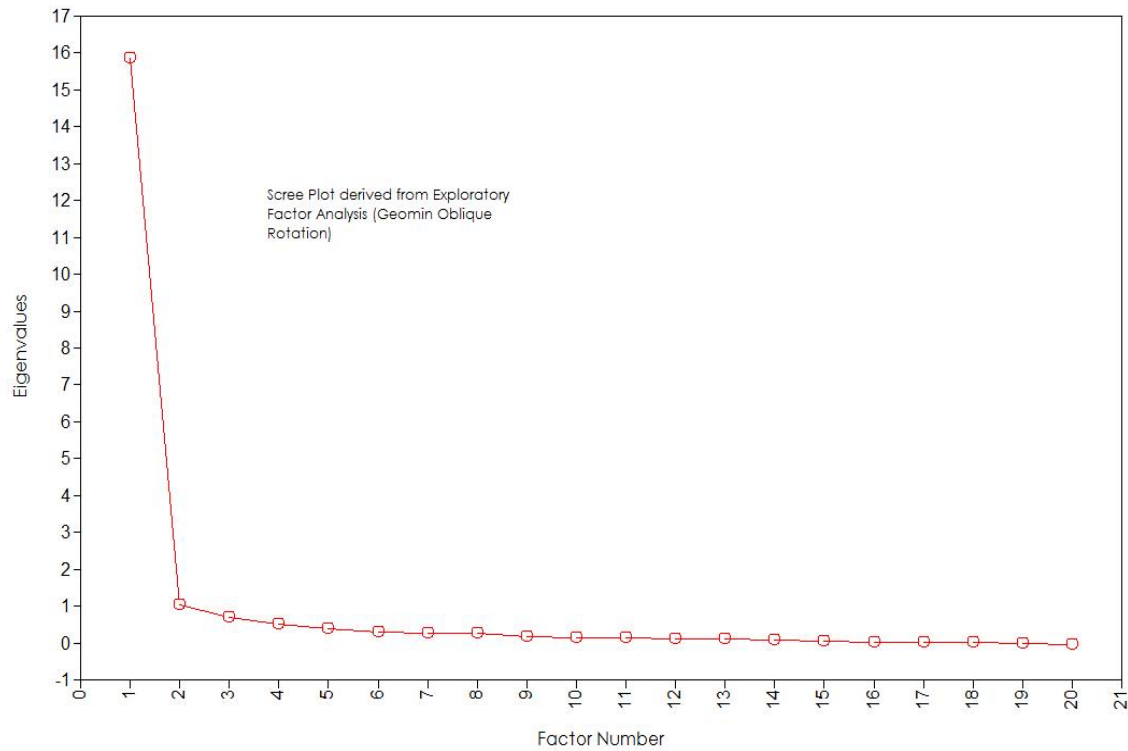

Supplement: pone.0198591.s002.pdf [file pone.0198591.s002.pdf]
